# Supplementary material for: Sexual behaviour changes and HIV infection among men who have sex with men: evidence from an open cohort in China
Source: HighWire-hosted journal article supplement (doi:10.1136/bmjopen-2021-055046), 2022-09-01
Supplement: bmjopen-2021-055046supp001_data_supplement.pdf [file bmjopen-2021-055046supp001_data_supplement.pdf]

## Contents

|                                                                                                                                                                   |    |
|-------------------------------------------------------------------------------------------------------------------------------------------------------------------|----|
| sFigure1. Flow diagram of the study .....                                                                                                                         | 2  |
| sTable1. Characteristics of excluded and included study participants at baseline.....                                                                             | 3  |
| sTable2. Univariate and multivariate cox proportional hazard model with time-varying covariates for HIV infection risk .....                                      | 5  |
| sTable3. Definition of sexual behavior indicator levels .....                                                                                                     | 7  |
| sTable4. Total number of follow-up times among MSM in Tianjin from 2011-2019 .....                                                                                | 8  |
| sTable5. HIV Incidence rates by year .....                                                                                                                        | 9  |
| sTable6. HIV incidence rate among age subgroups .....                                                                                                             | 10 |
| sTable7. Incidence rates for HIV infection among MSM with different follow-up times .....                                                                         | 11 |
| sTable8. Behavior transition type from baseline to each visit.....                                                                                                | 12 |
| sFigure2. Heatmap of percentage of each behavior transition type in each visit .....                                                                              | 13 |
| sFigure3. Kaplan-Meier curves of incident HIV among different Behavior changes.....                                                                               | 14 |
| sTable9. OR and 95% CI for behavior transition-type of “fragile” or “moderate” in the last follow-up stratified by the behavior type categories at baseline ..... | 15 |

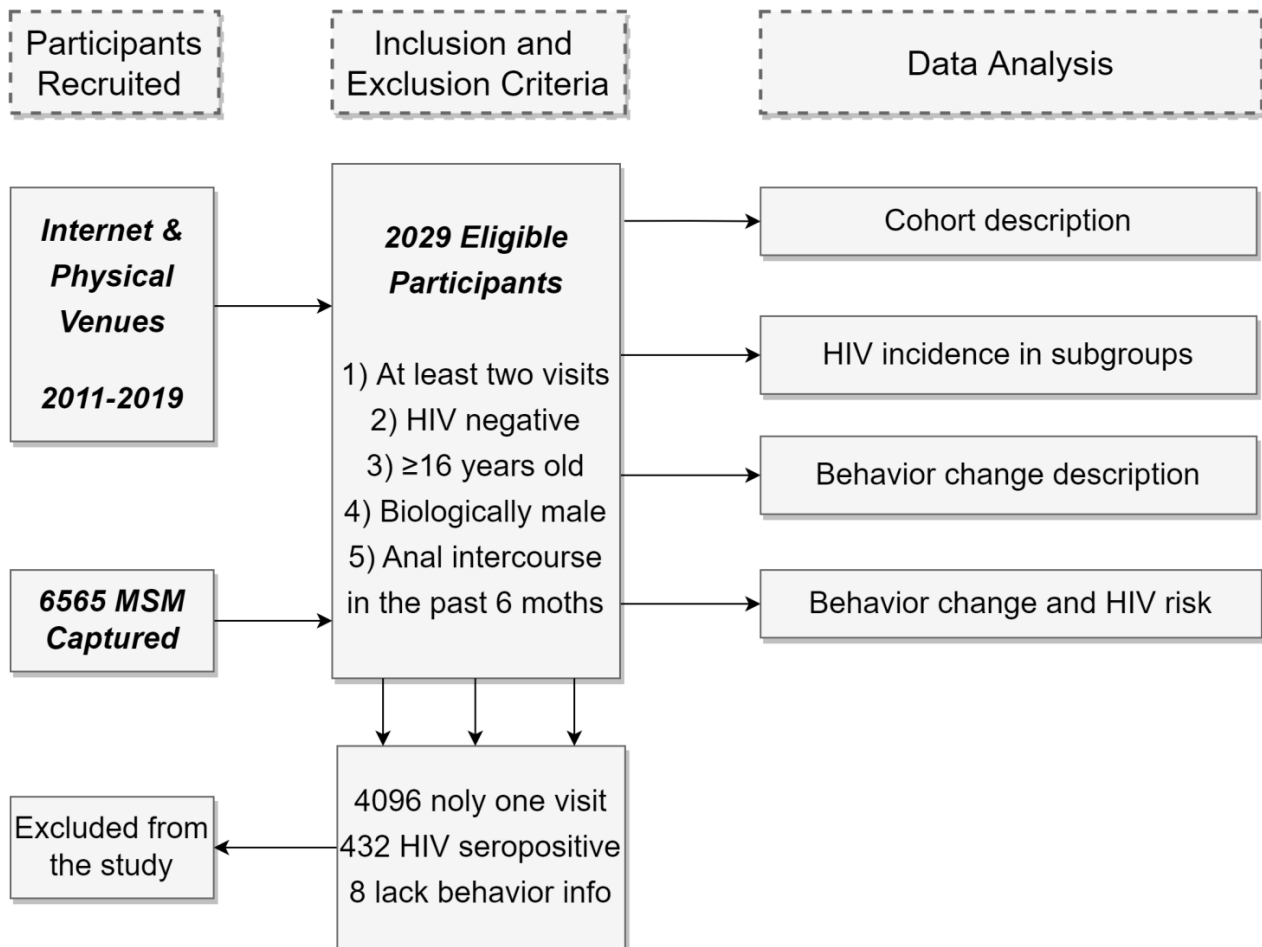

sFigure1. Flow diagram of the study

sTable1. Characteristics of excluded and included study participants at baseline

| Variables at Baseline                                       | Included (N=2029) | Excluded (N=4096) | P      |
|-------------------------------------------------------------|-------------------|-------------------|--------|
|                                                             | N (%)             | N (%)             |        |
| <b>Age</b>                                                  |                   |                   | 0.1555 |
| <45                                                         | 1504(74.13)       | 3098(75.63)       |        |
| 45-60                                                       | 464(22.87)        | 856(20.90)        |        |
| >60                                                         | 61(3.01)          | 142(3.47)         |        |
| <b>Marital status</b>                                       |                   |                   | 0.0198 |
| Married                                                     | 947(46.67)        | 1783(43.53)       |        |
| Unmarried                                                   | 1082(53.33)       | 2313(56.47)       |        |
| <b>Education</b>                                            |                   |                   | 0.6467 |
| Below high school                                           | 56(2.76)          | 125(3.05)         |        |
| High school                                                 | 1172(57.76)       | 2322(56.69)       |        |
| College or more                                             | 801(39.48)        | 1649(40.26)       |        |
| <b>Residence time in Tianjin</b>                            |                   |                   | 0.0001 |
| <3 months                                                   | 405(19.96)        | 1154(28.17)       |        |
| 3-7 months                                                  | 39(1.92)          | 125(3.05)         |        |
| 7-12 months                                                 | 41(2.02)          | 85(2.08)          |        |
| 1-2 years                                                   | 86(4.24)          | 166(4.05)         |        |
| >2 years                                                    | 1458(71.86)       | 2566(62.65)       |        |
| <b>Condom use in last anal sex</b>                          |                   |                   | 0.1283 |
| Yes                                                         | 1550(76.39)       | 3056(74.61)       |        |
| No                                                          | 479(23.61)        | 1040(23.39)       |        |
| <b>Frequency of condom use during anal sex<sup>ab</sup></b> |                   |                   | 0.6946 |
| Consistent use                                              | 785(38.69)        | 1606(39.21)       |        |
| Inconsistent use                                            | 1244(61.31)       | 2490(60.79)       |        |
| <b>Number of Sexual partners<sup>b</sup></b>                |                   |                   | 0.4535 |
| <10                                                         | 1709(84.23)       | 3480(84.96)       |        |
| More than 10                                                | 320(15.77)        | 616(15.04)        |        |
| <b>STI<sup>b</sup></b>                                      |                   |                   | 0.7909 |
| Yes                                                         | 68(3.35)          | 132(3.22)         |        |
| No                                                          | 1961(96.65)       | 3963(96.78)       |        |
| <b>Inject drugs<sup>b</sup></b>                             |                   |                   | 0.7625 |
| Yes                                                         | 22(1.08)          | 41(1.00)          |        |
| No                                                          | 2007(98.92)       | 4053(99.00)       |        |
| <b>Accept health service<sup>c</sup></b>                    |                   |                   | 0.0001 |
| Yes                                                         | 938(46.23)        | 1681(41.04)       |        |
| No                                                          | 1091(53.77)       | 2415(58.96)       |        |
| <b>MSW<sup>db</sup></b>                                     |                   |                   | 0.0369 |
| Yes                                                         | 102(5.03)         | 159(3.88)         |        |
| No                                                          | 1927(94.97)       | 3936(96.12)       |        |

Abbreviations: STI, sexually transmitted infections; MSW, male sex workers.

<sup>a</sup> The frequency of condom use during anal sex in the past 6 months was divided into two categories, consistent use (When engaging in anal intercourse, condoms were used in more than 80% of cases and condoms were used throughout the sex) and inconsistent use (other cases).

<sup>b</sup> In the past 6 months.

<sup>c</sup> Health service represented whether participants had accepted any HIV related health service (HIV testing, condom distribution, HIV risk reducing consult, peer education or HIV infection risk assessment) in the past 12 months.

---

<sup>d</sup>MSW stands for male sex workers. It represented if the participants have been obtained money or goods through sexual activity.

sTable2. Univariate and multivariate cox proportional hazard model with time-varying covariates for HIV infection risk

| Variables                                                   | Univariate cox regression analysis |            |         | Multivariate cox regression analysis <sup>e</sup> |           |         |
|-------------------------------------------------------------|------------------------------------|------------|---------|---------------------------------------------------|-----------|---------|
|                                                             | HR                                 | 95%CI      | P value | HR                                                | 95%CI     | P value |
| <b>Age</b>                                                  |                                    |            |         |                                                   |           |         |
| <45                                                         | REF                                |            |         |                                                   |           |         |
| 45-60                                                       | 1.14                               | 0.78-1.69  | 0.4819  |                                                   |           |         |
| >60                                                         | 0.94                               | 0.38-2.32  | 0.8956  |                                                   |           |         |
| <b>Marital status</b>                                       |                                    |            |         |                                                   |           |         |
| Married                                                     | REF                                |            |         | REF                                               |           |         |
| Unmarried                                                   | 4.73                               | 2.90-7.71  | 0.0001  | 4.72                                              | 2.86-7.78 | 0.0001  |
| <b>Education</b>                                            |                                    |            |         |                                                   |           |         |
| Below high school                                           | REF                                |            |         | REF                                               |           |         |
| High school                                                 | 0.51                               | 0.24-1.06  | 0.0719  | 0.93                                              | 0.43-2.01 | 0.7619  |
| College or more                                             | 0.29                               | 0.13-0.63  | 0.0018  | 0.47                                              | 0.20-1.07 | 0.0574  |
| <b>Residence time in Tianjin</b>                            |                                    |            |         |                                                   |           |         |
| <3 months                                                   | REF                                |            |         | REF                                               |           |         |
| 3-7 months                                                  | 0.52                               | 0.12-2.19  | 0.3804  | 0.66                                              | 0.16-2.83 | 0.5718  |
| 7-12 months                                                 | 1.71                               | 0.72-4.05  | 0.2195  | 1.14                                              | 0.48-2.78 | 0.7572  |
| 1-2 years                                                   | 0.27                               | 0.06-1.14  | 0.0770  | 0.27                                              | 0.06-1.13 | 0.0727  |
| >2 years                                                    | 0.50                               | 0.34-0.74  | 0.0005  | 0.68                                              | 0.46-1.07 | 0.0748  |
| <b>Condom use in last anal sex</b>                          |                                    |            |         |                                                   |           |         |
| Yes                                                         | REF                                |            |         | REF                                               |           |         |
| No                                                          | 12.39                              | 8.53-17.99 | 0.0001  | 5.10                                              | 3.19-8.13 | 0.0001  |
| <b>Frequency of condom use during anal sex<sup>ab</sup></b> |                                    |            |         |                                                   |           |         |
| Consistent use                                              | REF                                |            |         | REF                                               |           |         |
| Inconsistent use                                            | 10.13                              | 6.14-16.69 | 0.0001  | 3.66                                              | 1.97-6.82 | 0.0001  |
| <b>Number of sexual partners<sup>b</sup></b>                |                                    |            |         |                                                   |           |         |
| <10                                                         | REF                                |            |         | REF                                               |           |         |
| More than 10                                                | 1.33                               | 0.93-1.92  | 0.1173  | 1.53                                              | 1.05-2.24 | 0.0266  |
| <b>STI<sup>b</sup></b>                                      |                                    |            |         |                                                   |           |         |
| Yes                                                         | REF                                |            |         |                                                   |           |         |
| No                                                          | 0.88                               | 0.36-2.15  | 0.7831  |                                                   |           |         |
| <b>Inject drugs<sup>b</sup></b>                             |                                    |            |         |                                                   |           |         |
| Yes                                                         | REF                                |            |         |                                                   |           |         |
| No                                                          | 1.81                               | 0.25-13.01 | 0.5512  |                                                   |           |         |
| <b>Accept health service<sup>c</sup></b>                    |                                    |            |         |                                                   |           |         |
| Yes                                                         | REF                                |            |         | REF                                               |           |         |
| No                                                          | 1.55                               | 0.96-2.49  | 0.0687  | 1.20                                              | 0.74-1.94 | 0.4501  |
| <b>MSW<sup>db</sup></b>                                     |                                    |            |         |                                                   |           |         |
| Yes                                                         | REF                                |            |         | REF                                               |           |         |
| No                                                          | 0.66                               | 0.34-1.27  | 0.2183  | 1.39                                              | 0.71-2.72 | 0.3340  |

Abbreviation: STI, sexually transmitted infections; MSW, male sex workers; HR, hazard ratio; CI: confidence interval; REF, reference level.

<sup>a</sup> The frequency of condom use during anal sex in the past 6 months was divided into two categories, consistent use (When engaging in anal intercourse, condoms were used in more than 80% of cases and condoms were used throughout the sex) and inconsistent use (other cases).

<sup>b</sup> In the past 6 months.

<sup>c</sup> Health service represented whether participants had accepted any HIV related health service (HIV testing, condom distribution, HIV risk reducing consult, peer education or HIV infection risk assessment) in the past 12 months.

<sup>d</sup> MSW stands for male sex workers. It represented if the participants have been obtained money or goods through sexual activity.

<sup>e</sup> Multivariate cox regression analysis included marital status, education, residence time in Tianjin, condom use during last sex, condom use during

---

anal sex, number of sexual partners, health service utilization, MSW.

sTable3. Definition of sexual behavior indicator levels

| <b>Variables</b>                        | <b>Ideal level</b> | <b>Risky level</b> |
|-----------------------------------------|--------------------|--------------------|
| Condom use in last anal sex             | Yes                | No                 |
| Frequency of condom use during anal sex | Consistent use     | Inconsistent use   |
| Number of sexual partners               | <10                | More than 10       |

sTable4. Total number of follow-up times among MSM in Tianjin from 2011-2019

| Number of Follow-Up Times <sup>a</sup> | Number of MSM (%) | Cumulative Percentage (%) |
|----------------------------------------|-------------------|---------------------------|
| 2                                      | 832 (41.01)       | 41.01                     |
| 3                                      | 378 (18.63)       | 59.64                     |
| 4                                      | 240 (11.83)       | 71.46                     |
| 5                                      | 142 (7.00)        | 78.46                     |
| 6                                      | 111 (5.47)        | 83.93                     |
| 7                                      | 67 (3.30)         | 87.24                     |
| 8                                      | 56 (2.76)         | 90.00                     |
| 9                                      | 25 (1.23)         | 91.23                     |
| 10                                     | 33 (1.63)         | 92.85                     |
| >10                                    | 145 (7.15)        | 100.00                    |
| Total                                  | 2029 (100.00)     |                           |

<sup>a</sup> Represented the total number of follow-ups for each participant within the period from first enrollment to the last follow-up. Mean: 4.39 times; Standard Deviation: 3.96; Median: 3 times;  $P_{25}$ : 2 times;  $P_{75}$ : 5 times.



sTable5. HIV Incidence rates by year

| Year              | Number of MSM | HIV seroconversion | Incidence Rate<br>(95%CI) <sup>a</sup> |
|-------------------|---------------|--------------------|----------------------------------------|
| 2012 <sup>b</sup> | 454           | 8                  | 2.86 (1.59-5.14)                       |
| 2013              | 589           | 20                 | 4.57 (3.31-6.31)                       |
| 2014              | 702           | 18                 | 3.43 (2.35-4.98)                       |
| 2015              | 794           | 27                 | 4.65 (3.53-6.12)                       |
| 2016              | 860           | 16                 | 2.50 (1.63-3.83)                       |
| 2017              | 823           | 12                 | 2.13 (1.29-3.53)                       |
| 2018              | 776           | 10                 | 2.27 (1.32-3.93)                       |
| 2019              | 518           | 16                 | 5.51 (3.97-7.66)                       |

<sup>a</sup> When calculating the incidence rate, numerator was the number of HIV infection in each year and denominator was the sum of total actual survival time of each participant in this year.

<sup>b</sup> The first case of HIV seroconversion occurred in 2012, though the study started in 2011.

sTable6. HIV incidence rate among age subgroups

| Age subgroup | Number of MSM | HIV seroconversion | Incidence Rate (95%CI) |
|--------------|---------------|--------------------|------------------------|
| <45          | 1504          | 85                 | 3.83 (3.24-4.52)       |
| 45-60        | 464           | 37                 | 2.81 (2.14-3.69)       |
| >60          | 61            | 5                  | 2.08 (0.95-4.55)       |

sTable7. Incidence rates for HIV infection among MSM with different follow-up times

| Behavior transition type    |            | Incidence Rate Per 100 Person-Years (95%CI) |                     |                     | Total            |
|-----------------------------|------------|---------------------------------------------|---------------------|---------------------|------------------|
|                             |            | Protective                                  | Moderate            | Fragile             |                  |
| <b>2 Times<sup>a</sup></b>  | Protective | 1.73 (0.44-6.83)                            | 0 (0.00-0.00)       | 5.6 (2.39-13.12)    | 4.88 (3.65-6.53) |
|                             | Moderate   | 1.05 (0.15-7.38)                            | 1.51 (0.38-5.97)    | 0.8 (0.11-5.63)     |                  |
|                             | Fragile    | 10.27 (4.06-25.99)                          | 14.07 (7.92-24.99)  | 16.97 (11.14-25.85) |                  |
| <b>3 Times</b>              | Protective | 0 (0.00-0.00)                               | 0 (0.00-0.00)       | 0 (0.00-0.00)       | 4.49 (3.06-6.59) |
|                             | Moderate   | 3.18 (0.81-12.44)                           | 0 (0.00-0.00)       | 5.04 (1.67-15.18)   |                  |
|                             | Fragile    | 13.83 (6.58-29.07)                          | 21.07 (10.91-40.69) | 14.73 (7.43-29.19)  |                  |
| <b>4 Times</b>              | Protective | 0 (0.00-0.00)                               | 0 (0.00-0.00)       | 0 (0.00-0.00)       | 2.89 (1.72-4.84) |
|                             | Moderate   | 1.52 (0.22-10.63)                           | 1.16 (0.17-8.14)    | 0 (0.00-0.00)       |                  |
|                             | Fragile    | 15.24 (5.38-43.19)                          | 19.03 (9.77-37.06)  | 9.45 (2.53-35.33)   |                  |
| <b>5 Times</b>              | Protective | 0 (0.00-0.00)                               | 0 (0.00-0.00)       | 0 (0.00-0.00)       | 3.21 (1.74-5.91) |
|                             | Moderate   | 7.24 (1.91-27.51)                           | 0 (0.00-0.00)       | 4.97 (1.29-19.19)   |                  |
|                             | Fragile    | 7.86 (2.08-29.73)                           | 22.69 (8.39-61.37)  | 6.92 (1.04-45.85)   |                  |
| <b>6 times<br/>And more</b> | Protective | 0 (0.00-0.00)                               | 0.52 (0.07-3.67)    | 0.85 (0.21-3.38)    | 2.27 (1.64-3.15) |
|                             | Moderate   | 2.15 (0.90-5.12)                            | 0.44 (0.06-3.11)    | 0.41 (0.06-2.9)     |                  |
|                             | Fragile    | 16.08 (9.11-28.37)                          | 9.92 (4.64-21.2)    | 13.68 (7.46-25.1)   |                  |
| <b>Overall</b>              | Protective | 0.37 (0.09-1.48)                            | 0.19 (0.03-1.35)    | 1.37 (0.66-2.86)    | 3.36 (2.83-3.99) |
|                             | Moderate   | 2.27 (1.27-4.07)                            | 0.69 (0.26-1.83)    | 1.39 (0.67-2.9)     |                  |
|                             | Fragile    | 13.18 (9.15-18.99)                          | 15.37 (11.23-21.04) | 14.51 (10.77-19.55) |                  |
| <b>Total</b>                |            | 3.14 (2.30-4.29)                            | 2.92 (2.13-3.99)    | 4.02 (3.07-5.26)    |                  |

<sup>a</sup> 2 times represented the participants whose number of total follow-up times was 2, and so on. Participants were divided into subgroups according to their number of total follow-up times. The calculation of HIV incidence rate was done within each subgroup.

sTable8. Behavior transition type from baseline to each visit

| Behavior transition type in each visit <sup>a</sup> |             | Baseline    |             |               | Total        |
|-----------------------------------------------------|-------------|-------------|-------------|---------------|--------------|
| N (%)                                               | Protective  | Moderate    | Fragile     |               |              |
| 2 <sup>nd</sup>                                     | Protective  | 358 (17.64) | 303 (14.93) | 190 (9.36)    | 851 (41.94)  |
|                                                     | Moderate    | 193 (9.51)  | 293 (14.44) | 225 (11.09)   | 711 (35.04)  |
|                                                     | Fragile     | 92 (4.53)   | 167 (8.23)  | 208 (10.25)   | 467 (23.02)  |
| 3 <sup>rd</sup>                                     | Protective  | 176 (14.70) | 169 (14.12) | 118 (9.86)    | 463 (38.68)  |
|                                                     | Moderate    | 143 (11.95) | 181 (15.12) | 151 (12.61)   | 475 (39.68)  |
|                                                     | Fragile     | 67 (5.60)   | 92 (7.69)   | 100 (8.35)    | 259 (21.64)  |
| 4 <sup>th</sup>                                     | Protective  | 115 (14.04) | 110 (13.43) | 101 (12.33)   | 326 (39.80)  |
|                                                     | Moderate    | 102 (12.45) | 129 (15.75) | 93 (11.36)    | 324 (39.56)  |
|                                                     | Fragile     | 51 (6.23)   | 56 (6.84)   | 62 (7.57)     | 169 (20.63)  |
| 5 <sup>th</sup>                                     | Protective  | 86 (14.85)  | 65 (11.23)  | 49 (8.46)     | 200 (34.54)  |
|                                                     | Moderate    | 60 (10.36)  | 98 (16.93)  | 97 (16.75)    | 255 (44.04)  |
|                                                     | Fragile     | 44 (7.60)   | 38 (6.56)   | 42 (7.25)     | 124 (21.42)  |
| 6 <sup>th</sup>                                     | Protective  | 307 (13.57) | 235 (10.39) | 251 (11.10)   | 793 (35.06)  |
|                                                     | Moderate    | 421 (18.61) | 341 (15.08) | 373 (16.16)   | 1135 (50.18) |
|                                                     | Fragile     | 109 (4.82)  | 92 (4.20)   | 130 (5.75)    | 334 (14.77)  |
| And More                                            |             |             |             |               |              |
| Total                                               | 643 (31.69) | 763 (37.60) | 623 (30.70) | 8915 (100.00) |              |

<sup>a</sup> listed the number (proportion) of each behavior type in each visit.

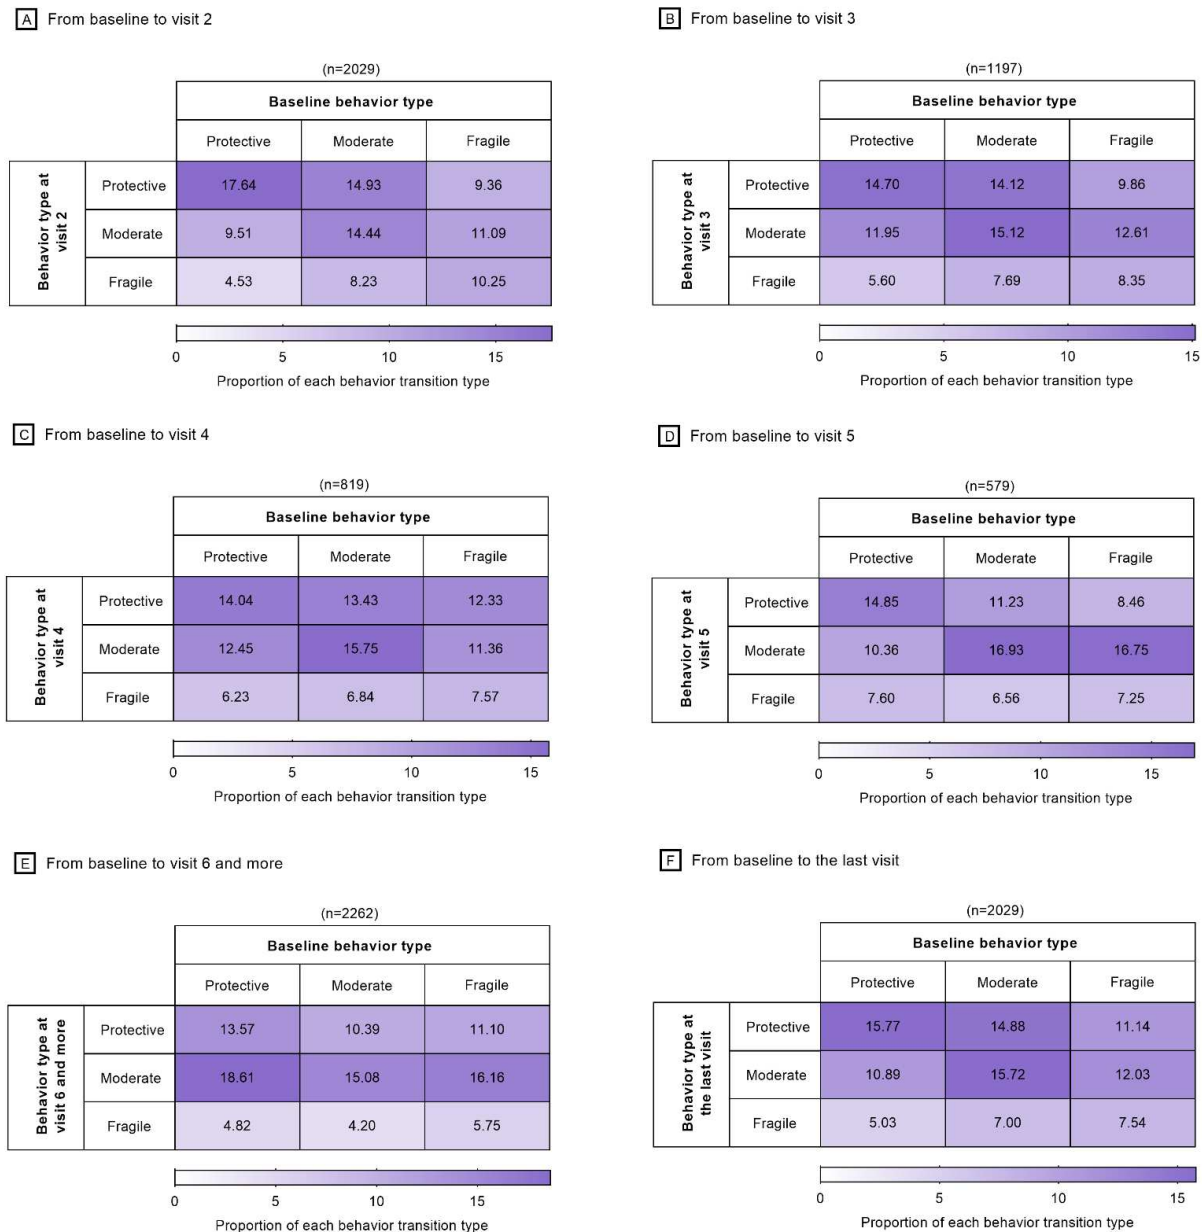

sFigure2. Heatmap of percentage of each behavior transition type in each visit

Figure legends 1: Values and colors indicated the percentage of each behavior transition type in each visit (for example, in Figure 1A, 17.64 represented the percentage of “protective” to “protective” was 17.64% from baseline to visit2). A lighter color indicates that the percentage was lower for MSM in that subgroup, whereas a darker color indicated a higher percentage in that subgroup.

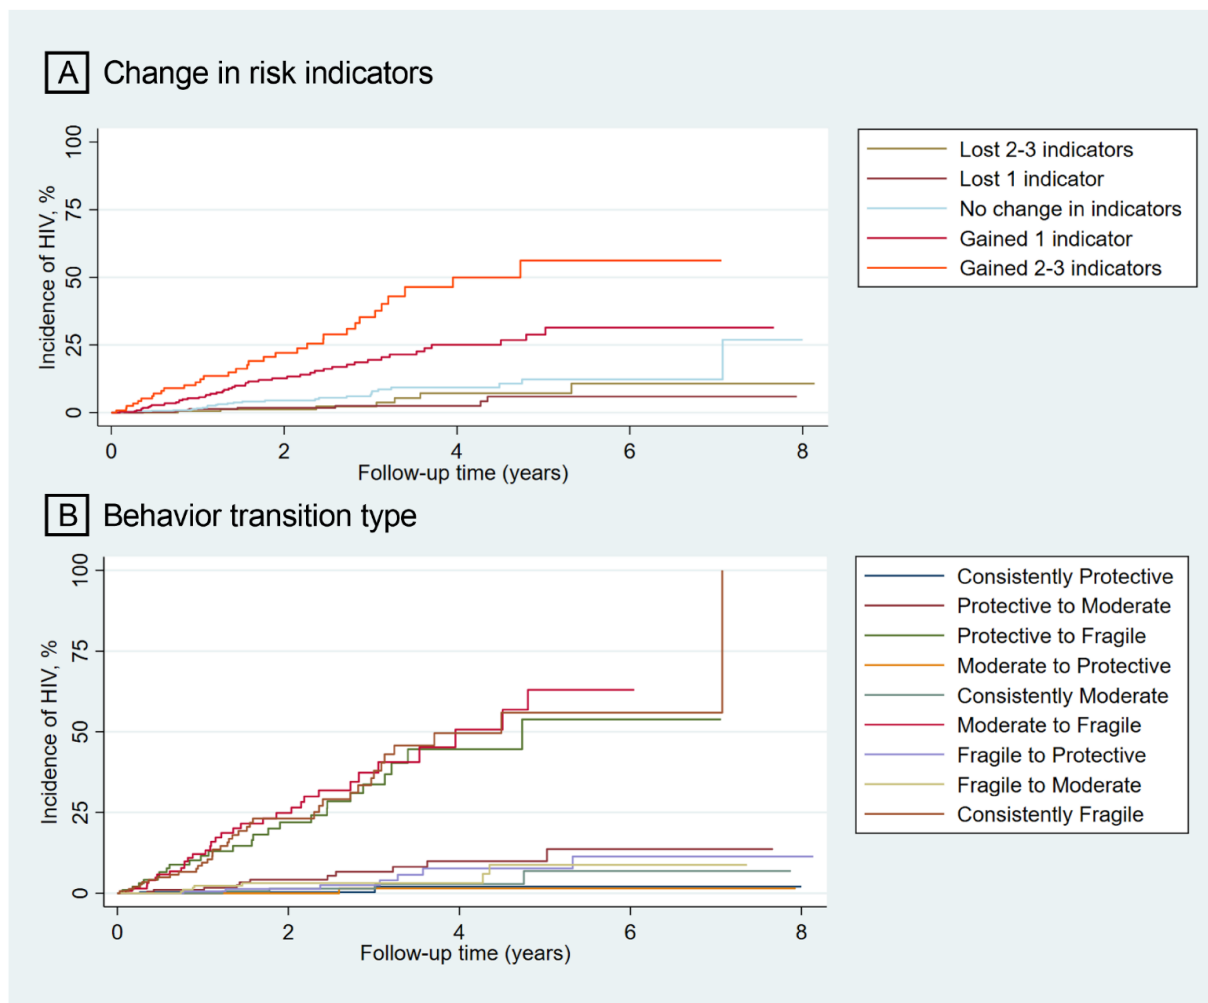

sFigure3. Kaplan-Meier curves of incident HIV among different Behavior changes

sTable9. OR and 95% CI for behavior transition-type of “fragile” or “moderate” in the last follow-up stratified by the behavior type categories at baseline

| Behavior changes                                        | “Fragile” or “Moderate” at the last follow-up as the dependent variable, OR (95% CI) <sup>a</sup> |                      |                     |
|---------------------------------------------------------|---------------------------------------------------------------------------------------------------|----------------------|---------------------|
|                                                         | Protective at baseline                                                                            | Moderate at baseline | Fragile at baseline |
| <b>Per 1-time increase in the total follow-up times</b> | 1.02 (0.98-1.06)                                                                                  | 0.99 (0.95-1.03)     | 0.95 (0.91-0.99)    |
| <b>Age</b>                                              |                                                                                                   |                      |                     |
| <45                                                     | REF                                                                                               | REF                  | REF                 |
| 45-60                                                   | 0.57 (0.37-0.87)                                                                                  | 0.45 (0.29-0.68)     | 0.52 (0.35-0.78)    |
| >60                                                     | 0.48 (0.16-1.39)                                                                                  | 0.23 (0.10-0.54)     | 0.71 (0.25-2.05)    |
| <b>Residence time in Tianjin</b>                        |                                                                                                   |                      |                     |
| <3 months                                               | REF                                                                                               | REF                  | REF                 |
| 3-7 months                                              | 0.51 (0.11-2.32)                                                                                  | 1.31 (0.40-4.30)     | 3.54 (0.75-16.63)   |
| 7-12 months                                             | 1.06 (0.36-3.12)                                                                                  | 1.53 (0.30-7.78)     | 1.76 (0.53-5.86)    |
| 1-2 years                                               | 1.93 (0.75-4.97)                                                                                  | 0.89 (0.40-1.96)     | 1.88 (0.72-4.85)    |
| >2 years                                                | 0.92 (0.59-1.43)                                                                                  | 0.65 (0.45-0.99)     | 1.10 (0.73-1.66)    |

Abbreviation: OR, odds ratio; CI: confidence interval; REF, reference level.

<sup>a</sup> Multivariate logistic regression analysis included total follow-up times, age, marital status, education, residence time in Tianjin, health service utilization
